# Supplementary material
Source: MDPI journal article supplement (https://www.mdpi.com/2073-4433/12/4/521)
Supplement: s1 [file s1]

## Supplementary material

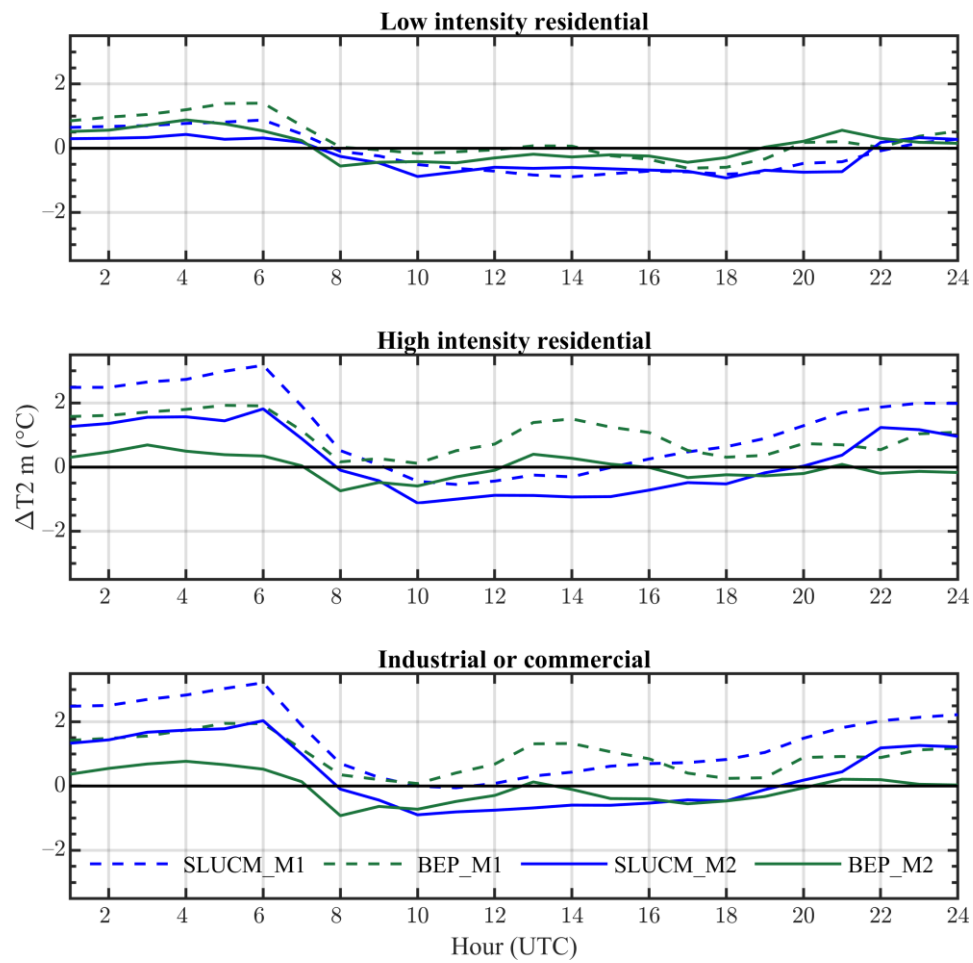

**Figure S1.** Heatwave mean diurnal cycle decomposition of the near-surface UHI into *Low intensity residential* (top), *High intensity residential* (middle) and *Industrial or commercial* (bottom) using Method 1 (M1 - dashed lines) and Method 2 (M2 - solid lines), for SLUCM (blue lines) and BEP (green lines) UCMs.

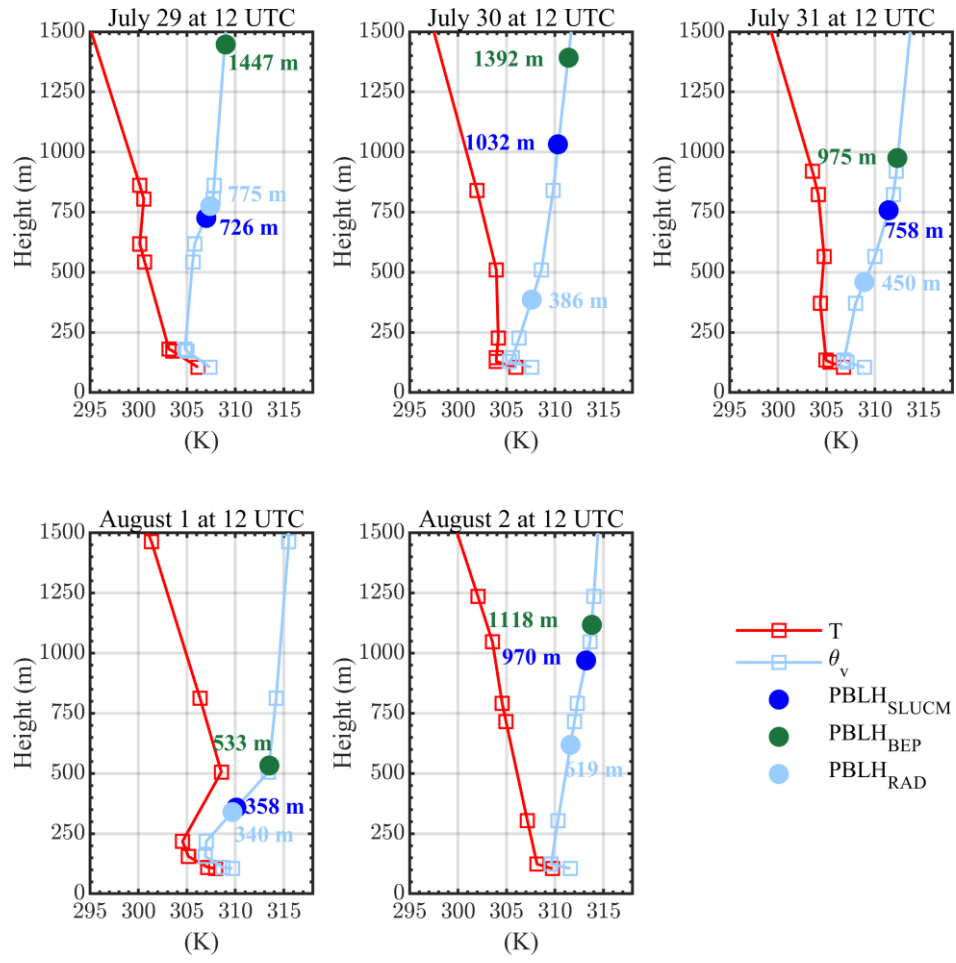

**Figure S2.** Vertical temperature (T) and virtual potential temperature ( $\theta_v$ ) profiles from sounding at Gago Coutinho meteorological station location, and comparison between modelled (PBLH<sub>SLUCM</sub> and PBLH<sub>BEP</sub>) and observed (PBLH<sub>RAD</sub>) PBLH.

**Table S1.** Equivalences between land use categories from CORINE 2012 and USGS33 classification system, together with the respective surface properties for the summer period. Adapted from Pineda et al. (2004) [1] and Carvalho et al. (2017) [2].

| Category equivalence |                                              |        |                                  | Surface properties (summer values) |                   |                        |                       |                                                                           |                                                                       |
|----------------------|----------------------------------------------|--------|----------------------------------|------------------------------------|-------------------|------------------------|-----------------------|---------------------------------------------------------------------------|-----------------------------------------------------------------------|
| CORINE 2012          | Description                                  | USGS33 | Description                      | Albedo [%]                         | Soil moisture [%] | Surface emissivity [%] | Roughness length [cm] | Thermal inertia [cal cm <sup>-2</sup> K <sup>-1</sup> s <sup>-1/2</sup> ] | Thermal capacity [10 <sup>5</sup> J m <sup>-3</sup> K <sup>-1</sup> ] |
| 1                    | Continuous urban fabric                      | 32     | High intensity residential (HIR) | 10                                 | 10                | 97                     | 80                    | 3                                                                         | 18.9                                                                  |
| 2                    | Discontinuous urban fabric                   | 31     | Low intensity residential (LIR)  | 10                                 | 10                | 97                     | 80                    | 3                                                                         | 18.9                                                                  |
| 3                    | Industrial or commercial units               | 33     | Industrial or commercial (IC)    | 10                                 | 10                | 97                     | 80                    | 3                                                                         | 18.9                                                                  |
| 4                    | Road and rail networks and associated land   |        |                                  |                                    |                   |                        |                       |                                                                           |                                                                       |
| 5                    | Port areas                                   |        |                                  |                                    |                   |                        |                       |                                                                           |                                                                       |
| 6                    | Airports                                     |        |                                  |                                    |                   |                        |                       |                                                                           |                                                                       |
| 7                    | Mineral extraction sites                     |        |                                  |                                    |                   |                        |                       |                                                                           |                                                                       |
| 8                    | Dump sites                                   |        |                                  |                                    |                   |                        |                       |                                                                           |                                                                       |
| 9                    | Construction sites                           |        |                                  |                                    |                   |                        |                       |                                                                           |                                                                       |
| 11                   | Sport and leisure facilities                 |        |                                  |                                    |                   |                        |                       |                                                                           |                                                                       |
| 12                   | Non-irrigated arable land                    | 2      | Dryland cropland and pasture     | 17                                 | 30                | 98.5                   | 15                    | 4                                                                         | 25                                                                    |
| 18                   | Pastures                                     |        |                                  |                                    |                   |                        |                       |                                                                           |                                                                       |
| 10                   | Green urban areas                            | 3      | Irrigated cropland and pasture   | 18                                 | 50                | 98.5                   | 10                    | 4                                                                         | 25                                                                    |
| 13                   | Permanently irrigated land                   |        |                                  |                                    |                   |                        |                       |                                                                           |                                                                       |
| 14                   | Rice fields                                  |        |                                  |                                    |                   |                        |                       |                                                                           |                                                                       |
| 15                   | Vineyards                                    | 6      | Cropland/woodland mosaic         | 16                                 | 35                | 98.5                   | 20                    | 4                                                                         | 25                                                                    |
| 16                   | Fruit trees and berry plantations            |        |                                  |                                    |                   |                        |                       |                                                                           |                                                                       |
| 17                   | Olive groves                                 |        |                                  |                                    |                   |                        |                       |                                                                           |                                                                       |
| 19                   | Annual crops associated with permanent crops |        |                                  |                                    |                   |                        |                       |                                                                           |                                                                       |
| 20                   | Complex cultivation patterns                 |        |                                  |                                    |                   |                        |                       |                                                                           |                                                                       |

|    |                                                                                                 |    |                                 |    |     |    |      |   |      |
|----|-------------------------------------------------------------------------------------------------|----|---------------------------------|----|-----|----|------|---|------|
| 21 | Land principally occupied<br>by agriculture, with<br>significant areas of natural<br>vegetation |    |                                 |    |     |    |      |   |      |
| 22 | Agro-forestry areas                                                                             |    |                                 |    |     |    |      |   |      |
| 26 | Natural grassland                                                                               | 7  | Grassland                       | 19 | 15  | 96 | 12   | 3 | 20.8 |
| 27 | Moors and heathland                                                                             | 9  | Mixed<br>shrubland/grassland    | 20 | 15  | 95 | 6    | 3 | 20.8 |
| 28 | Sclerophyllous vegetation                                                                       |    |                                 |    |     |    |      |   |      |
| 29 | Transitional woodland-<br>scrub                                                                 |    |                                 |    |     |    |      |   |      |
| 23 | Broad-leaved forest                                                                             | 11 | Deciduous broadleaf<br>forest   | 16 | 30  | 93 | 50   | 4 | 25   |
| 24 | Coniferous forest                                                                               | 14 | Evergreen broadleaf<br>forest   | 12 | 30  | 95 | 50   | 4 | 29.2 |
| 25 | Mixed forest                                                                                    | 15 | Mixed forest                    | 13 | 30  | 97 | 50   | 4 | 41.8 |
| 40 | Water courses                                                                                   | 16 | Water bodies                    | 8  | 100 | 98 | 0.01 | 6 | 9    |
| 41 | Water bodies                                                                                    |    |                                 |    |     |    |      |   |      |
| 42 | Coastal lagoons                                                                                 |    |                                 |    |     |    |      |   |      |
| 43 | Estuaries                                                                                       |    |                                 |    |     |    |      |   |      |
| 44 | Sea and ocean                                                                                   |    |                                 |    |     |    |      |   |      |
| 35 | Inland marshes                                                                                  | 17 | Herbaceous Wetland              | 14 | 60  | 95 | 20   | 6 | 29.2 |
| 36 | Peat bogs                                                                                       |    |                                 |    |     |    |      |   |      |
| 37 | Salt marshes                                                                                    |    |                                 |    |     |    |      |   |      |
| 38 | Salines                                                                                         |    |                                 |    |     |    |      |   |      |
| 39 | Intertidal flats                                                                                |    |                                 |    |     |    |      |   |      |
| 30 | Beaches, dunes and sands                                                                        | 19 | Barren or sparsely<br>vegetated | 25 | 2   | 90 | 1    | 2 | 12   |
| 31 | Bare rocks                                                                                      |    |                                 |    |     |    |      |   |      |
| 32 | Sparsely vegetated areas                                                                        |    |                                 |    |     |    |      |   |      |
| 33 | Burnt areas                                                                                     |    |                                 |    |     |    |      |   |      |
| 34 | Glaciers and perpetual<br>snow                                                                  | 24 | Snow or ice                     | 55 | 95  | 95 | 0.1  | 5 | 9    |

**Table S2.** Statistics and error measures of observed and modelled (for SLUCM, BEP, NO\_SLUCM, and NO\_BEP) T2m during the heatwave period at the nine meteorological stations locations. Values for NO\_SLUCM and NO\_BEP are shown only as averages of all the stations, except for BIAS that shows values for every station. Temperature units are °C.

| Station name     | Observations |        |        |         | SLUCM/BEP (NO_SLUCM/NO_BEP) |                          |                          |                     |                      |                      |                      |                      |                          |
|------------------|--------------|--------|--------|---------|-----------------------------|--------------------------|--------------------------|---------------------|----------------------|----------------------|----------------------|----------------------|--------------------------|
|                  | Min. T       | Max. T | Mean T | STD_OBS | Min. T                      | Max. T                   | Mean T                   | BIAS                | RMSE                 | STDE                 | STD_MOD              | RMSD                 | r                        |
| Lisbon/Alvalade  | 20.3         | 43.5   | 30.5   | 5.7     | 20.7/21.9                   | 39.8/40.7                | 29.8/30.5                | -0.7/0.0 (0.9/0.9)  | 2.8/2.7              | 2.7/2.7              | 5.3/4.9              | 2.7/2.7              | 0.88/0.88                |
| Amadora          | 20.6         | 43.3   | 30.0   | 5.6     | 20.6/22.5                   | 39.2/39.7                | 29.7/30.4                | -0.3/0.4 (1.0/1.2)  | 2.5/2.8              | 2.5/2.7              | 4.9/4.5              | 2.5/2.7              | 0.89/0.87                |
| Lisbon/Baixa     | 20.5         | 42.3   | 30.6   | 5.7     | 23.1/22.8                   | 40.5/41.1                | 31.0/30.9                | 0.4/0.3 (1.4/1.3)   | 2.9/2.7              | 2.9/2.7              | 4.8/5.2              | 2.9/2.7              | 0.87/0.88                |
| Lisbon/Benfica   | 18.7         | 45.3   | 30.5   | 6.6     | 20.0/22.4                   | 40.2/40.8                | 29.5/30.4                | -1.0/-0.1 (1.0/1.1) | 3.2/3.3              | 3.0/3.3              | 5.4/4.9              | 3.0/3.3              | 0.90/0.87                |
| Barreiro         | 19.3         | 43.0   | 30.0   | 5.7     | 21.9/21.6                   | 40.6/41.7                | 30.5/30.5                | 0.5/0.5 (1.4/1.3)   | 2.6/2.8              | 2.5/2.8              | 5.2/5.8              | 2.5/2.8              | 0.90/0.88                |
| Cacém            | 18.9         | 46.1   | 28.6   | 6.8     | 18.9/19.5                   | 40.3/40.0                | 29.0/29.3                | 0.4/0.6 (1.1/1.1)   | 3.4/3.0              | 3.3/2.9              | 5.5/5.4              | 3.3/2.9              | 0.87/0.91                |
| Lisbon/Estefânia | 21.1         | 44.7   | 31.4   | 5.5     | 22.4/22.1                   | 40.4/41.2                | 30.8/30.7                | -0.5/-0.6 (0.3/0.2) | 2.9/2.7              | 2.8/2.7              | 4.8/5.2              | 2.8/2.7              | 0.86/0.88                |
| Lisbon/Airport   | 19.8         | 41.5   | 30.0   | 5.1     | 22.7/22.2                   | 40.1/39.9                | 30.9/30.5                | 0.9/0.4 (1.3/1.3)   | 2.8/2.6              | 2.7/2.6              | 4.7/4.9              | 2.7/2.6              | 0.86/0.87                |
| Lisbon/Geofísico | 20.7         | 41.4   | 30.1   | 4.8     | 21.8/22.4                   | 40.4/40.6                | 30.4/30.8                | 0.3/0.7 (1.7/1.6)   | 2.7/2.9              | 2.7/2.9              | 5.0/5.0              | 2.7/2.9              | 0.85/0.83                |
| Mean             | 20.0         | 43.5   | 30.2   | 5.7     | 21.3/21.9<br>(22.2/22.4)    | 40.2/40.6<br>(40.9/40.7) | 30.2/30.4<br>(31.3/31.3) | - / -<br>- / -      | 2.9/2.9<br>(3.3/3.3) | 2.8/2.8<br>(3.1/3.1) | 5.1/5.1<br>(5.1/4.9) | 2.8/2.8<br>(3.1/3.1) | 0.88/0.87<br>(0.84/0.84) |

## References

1. Pineda, N.; Jorba, O.; Jorge, J.; Baldasano, J.M. Using NOAA AVHRR and SPOT VGT Data to Estimate Surface Parameters: Application to a Mesoscale Meteorological Model. *Int. J. Remote Sens.* **2004**, *25*, 129–143, doi:10.1080/0143116031000115201.
2. Carvalho, D.; Martins, H.; Marta-Almeida, M.; Rocha, A.; Borrego, C. Urban Resilience to Future Urban Heat Waves under a Climate Change Scenario: A Case Study for Porto Urban Area (Portugal). *Urban Clim.* **2017**, *19*, 1–27, doi:10.1016/j.uclim.2016.11.005.
